# Supplementary material
Source: PubMed Central journal article supplement (PMC2453058)
Supplement: jc.2008-0403_2.pdf [file jc.2008-0403_2.pdf]

**Supplemental Table 1.** Clinical Characteristics of the study cohort

|                            | Control (n=187) | PCOS (n=287)                  |
|----------------------------|-----------------|-------------------------------|
| Age (yr)                   | 33.0 (17.0)     | 27.5 (11.5) <sup>a</sup>      |
| BMI (kg/m <sup>2</sup> )   | 24.1 (6.4)      | 34.7 (13.5) <sup>a</sup>      |
| WHR                        | 0.78 (0.08)     | 0.83 (0.10) <sup>a</sup>      |
| mFG score                  | 0 (0)           | 7.0 (5.0) <sup>a</sup>        |
| Hirsute (%)                | 0               | 73.9 <sup>a</sup>             |
| Total testosterone (ng/dl) | 41.0 (26.5)     | 80.0 (31.0) <sup>a</sup>      |
| Free testosterone (pg/ml)  | 0.35 (0.26)     | 0.84 (0.47) <sup>a</sup>      |
| DHEAS (ng/ml)              | 950.0 (749.0)   | 2084.0 (1697.80) <sup>a</sup> |
| SHBG (nmol/l) <sup>b</sup> | 220.0 (120.0)   | 150.0 (70.0) <sup>a</sup>     |
| Insulin (μIU/ml)           | 6.9 (6.4)       | 18.0 (18.0) <sup>a</sup>      |
| Glucose (mg/dl)            | 86.0 (10.0)     | 86.0 (13.0)                   |
| HOMA-IR                    | 0.92 (0.83)     | 2.29 (1.93) <sup>a</sup>      |
| HOMA-%B                    | 103.9 (59.5)    | 175.3 (99.3) <sup>a</sup>     |

Abbreviations: BMI is body mass index, WHR is waist to hip ratio; mFG is the modified Ferriman-Gallwey hirsutism score; SHBG is sex hormone-binding globulin; HOMA-IR is insulin resistance estimated by the homeostatic model assessment; and HOMA-%B is beta-cell function estimated by the homeostatic model assessment.

Data are median (interquartile range).

To convert total testosterone from ng/dl to nmol/l, multiply by 0.03467; to convert free testosterone from pg/ml to pmol/l, multiply by 34.67; to convert DHEAS from ng/ml to μmol/l, multiply by 0.002714; to convert insulin from μIU/ml to pmol/l, multiply by 7.175; to convert glucose from mg/dl to mmol/l, multiply by 0.05551.

<sup>a</sup> P < 0.001 compared to control group

<sup>b</sup> SHBG activity was measured by competitive binding analysis, using Sephadex G-25 and [<sup>3</sup>H]T as the ligand; this assay gives values of approximately 100-300 nmol/l in normal adult women.
